# Supplementary material
Source: publisher site journal article supplement (https://www.spandidos-publications.com/1305/downloadSupplementary)

Figure S1. A375R cells are resistant to PLX4032. (A) Both parental A375 and resistant A375R cells were treated with various concentrations of PLX4032 (0.1, 0.5, 1, 5 and 10  $\mu\text{M}$ ) for 48 h, and the cell viabilities were measured by MTT assay. (B) Both parental A375 and resistant A375R cells were treated with various concentrations of PLX4032 (0, 2 and 5  $\mu\text{M}$ ) for 24 h, and the apoptosis rates were detected by Annexin V and 7-AAD staining. Data were presented as the mean  $\pm$  standard error of the mean. A two-way ANOVA, with post hoc Tukey's test was applied for the comparison.  $^*\#P<0.05$ .  $^{**}\#\#P<0.01$ . The  $^*$  refers to comparisons with the parental A375 groups. The  $\#$  refers to comparisons with ME group. ME, medium control.

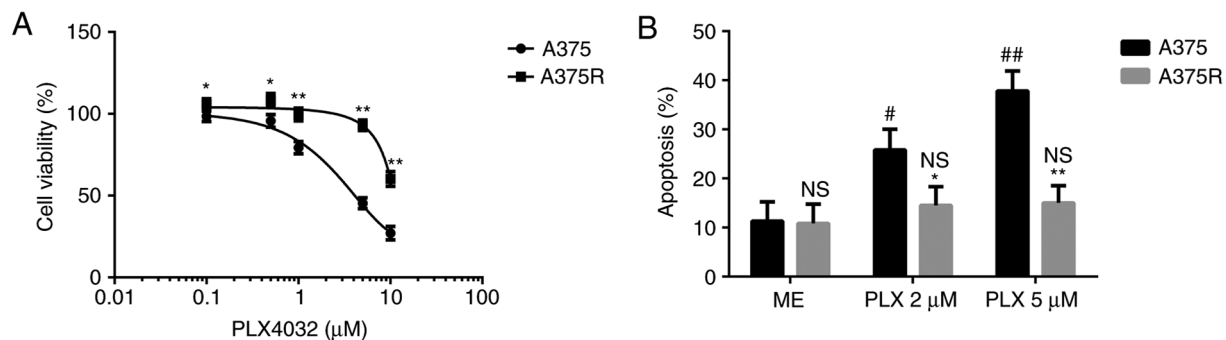

Supplement: Supplementary file 1 [file downloadSupplementary]
